40. Chen YC, Auer-Grumbach M, Matsukawa S, Zitzelsberger M, Themistocleous AC, Strom TM, Samara C, Moore AW, Cho LT, Young GT, Weiss C, Schabhüttl M, Stucka R, Schmid AB, Parman Y, Graul-Neumann L, Heinritz W, Passarge E, Watson RM, Hertz JM, Moog U, Baumgartner M, Valente EM, Pereira D, Restrepo CM, Katona I, Dusl M, Stendel C, Wieland T, Stafford F, Reimann F, von Au K, Finke C, Willems PJ, Nahorski MS, Shaikh SS, Carvalho OP, Nicholas AK, Karbani G, McAleer MA, Cilio MR, McHugh JC, Murphy SM, Irvine AD, Jensen UB, Windhager R, Weis J, Bergmann C, Rautenstrauss B, Baets J, De Jonghe P, Reilly MM, Kropatsch R, Kurth I, Chrast R, Michiue T, Bennett DL, Woods CG, Senderek J: Corrigendum: Transcriptional regulator PRDM12 is essential for human pain perception. *Nat Genet* 2015; 47:962
41. Wang C, Song S, Zhang Y, Ge Y, Fang X, Huang T, Du J, Gao J: Inhibition of the Rho/Rho kinase pathway prevents lipopolysaccharide-induced hyperalgesia and the release of TNF- $\alpha$  and IL-1 $\beta$  in the mouse spinal cord. *Sci Rep* 2015; 5:14553
42. Wang C, Wang H, Pang J, Li L, Zhang S, Song G, Li N, Cao J, Zhang L: Glial cell-derived neurotrophic factor attenuates neuropathic pain in a mouse model of chronic constriction injury: Possible involvement of E-cadherin/p120ctn signaling. *J Mol Neurosci* 2014; 54:156–63
43. Aldrich R: Ionic channels of excitable-membranes. *Science* 1985; 228:867–8
44. Duan KZ, Xu Q, Zhang XM, Zhao ZQ, Mei YA, Zhang YQ: Targeting A-type K(+) channels in primary sensory neurons for bone cancer pain in a rat model. *Pain* 2012; 153:562–74
45. Usoskin D, Furlan A, Islam S, Abdo H, Lönnerberg P, Lou D, Hjerling-Leffler J, Haeggström J, Kharchenko O, Kharchenko PV, Linnarsson S, Ernfrors P: Unbiased classification of sensory neuron types by large-scale single-cell RNA sequencing. *Nat Neurosci* 2015; 18:145–53

## ANESTHESIOLOGY REFLECTIONS FROM THE WOOD LIBRARY-MUSEUM

### Shaker Anodyne: Teetotalers' Valerian Elixir

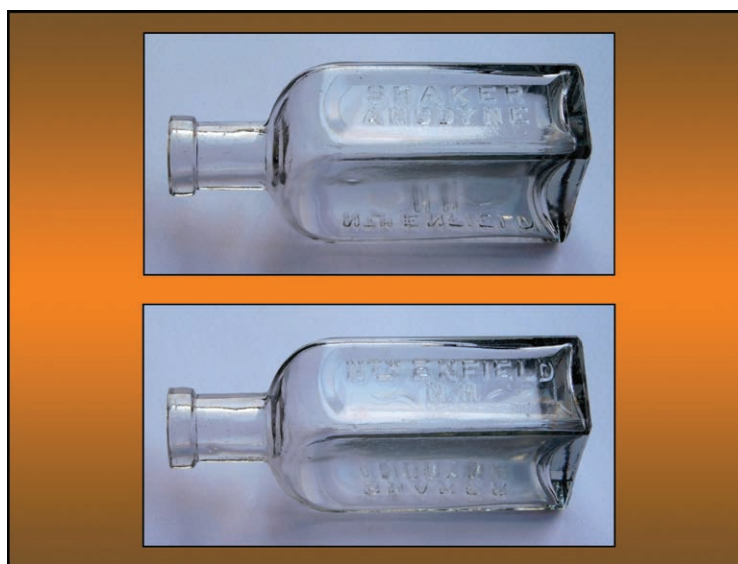

A religious group founded in England in the 1740s, the Shakers were organized in the United States by the 1780s and lived in communes from upstate New York and New England to urban Philadelphia and the Midwest. A uniquely celibate sect of Christian teetotalers, their ecstatic singing and dancing at worship had earned them the sobriquet of “Shaking Quakers,” or Shakers. Up through the 1890s, their North Enfield (*bottom*, “N<sup>th</sup> Enfield / N.H.”) community in New Hampshire compounded “Brown’s Pure Extract of English Valerian,” better known as “Shaker Anodyne” (*top*). The root of the English, not American, Valerian plant contained a soporific and analgesic volatile oil. Likely contributing to Shaker Anodyne’s popularity was the fact that the root was mixed into a strongly alcoholic elixir spiked with opium and an herb widely regarded as Satanic, containing hyoscyne and atropine: henbane. (Copyright © the American Society of Anesthesiologists’ Wood Library-Museum of Anesthesiology.)

Melissa L. Coleman, M.D., Penn State College of Medicine, Hershey, Pennsylvania, and Jane S. Moon, M.D., University of California, Los Angeles, California.
